# Cessation behaviours among smokers of menthol and flavoured cigarettes following the implementation of the EU Tobacco Products Directive: findings from the EUREST-PLUS ITC Europe Surveys

Mateusz Zatoński<sup>1,2,3</sup>, Aleksandra Herbec<sup>1,4</sup>, Witold Zatoński<sup>1,3</sup>, Kinga Janik-Konieczna<sup>1,3</sup>, Pete Driezen<sup>5,6</sup>, Tibor Demjén<sup>7</sup>, Esteve Fernández<sup>8,9,10,11</sup>, Geoffrey T. Fong<sup>5,6,12</sup>, Anne C. K. Quah<sup>5</sup>, Christina N. Kyriakos<sup>12,13</sup>, Ann McNeill<sup>14</sup>, Marc Willemsen<sup>15</sup>, Ute Mons<sup>16</sup>, Yannis Tountas<sup>17</sup>, Antigona C. Trofor<sup>18,19</sup>, Constantine I. Vardavas<sup>13,20,21</sup>, Krzysztof Przewoźniak<sup>1,22,23</sup>, on behalf of the EUREST-PLUS Consortium\*

- 1 Health Promotion Foundation, Warsaw, Poland
- 2 Tobacco Control Research Group, Department for Health, University of Bath, Bath, UK
- 3 European Observatory of Health Inequalities, President Stanislaw Wojciechowski State University of Applied Sciences, Kalisz, Poland
- 4 Centre for Behaviour Change, Clinical, Educational and Health Psychology, University College London, UK
- 5 Department of Psychology, University of Waterloo, Waterloo, Canada
- 6 School of Public Health and Health Systems, University of Waterloo, Waterloo, Canada
- 7 Smoking or Health Hungarian Foundation (SHHF), Budapest, Hungary
- 8 Cancer Epidemiology and Prevention Department, Catalan Institute of Oncology (ICO), L'Hospitalet de Llobregat, Spain
- 9 Tobacco Control Unit, Bellvitge Biomedical Research Institute (IDIBELL), L'Hospitalet de Llobregat, Spain
- 10 School of Medicine and Health Sciences, University of Barcelona (UB), Barcelona, Spain
- 11 Consortium for Biomedical Research in Respiratory Diseases (CIBER en Enfermedades Respiratorias, CIBERES), Madrid, Spain
- 12 Ontario Institute for Cancer Research, Toronto, Canada
- 13 European Network for Smoking and Tobacco Prevention (ENSP), Brussels, Belgium
- 14 Department of Addictions, Institute of Psychiatry, Psychology & Neuroscience, King's College London, London, UK
- 15 Department of Health Promotion, CAPHRI Care and Public Health Research Institute, Maastricht University, Maastricht, the Netherlands
- 16 German Cancer Research Center (DKFZ), Cancer Prevention Unit and WHO Collaborating Centre for Tobacco Control, Heidelberg, Germany
- 17 Center for Health Services Research, School of Medicine, National and Kapodistrian University of Athens (UoA), Athens, Greece
- 18 University of Medicine and Pharmacy 'Grigore T. Popa' Iasi, Iasi, Romania
- 19 Aer Pur Romania, Bucharest, Romania
- 20 School of Medicine, University of Crete (UoC), Heraklion, Greece
- 21 European Respiratory Society, Lausanne, Switzerland
- 22 Maria Skłodowska-Curie National Research Institute of Oncology, Warsaw, Poland
- 23 Collegium Civitas, Warsaw, Poland

\*The members of the EUREST-PLUS Consortium are listed in Acknowledgements section.

**Correspondence:** Mateusz Zatoński, Tobacco Control Research Group, Department for Health, University of Bath, Bath, UK, Tel/Fax: +44 (0) 1225 38 383712, e-mail: mzz27@bath.ac.uk

The European Tobacco Products Directive (TPD) introduced a ban on characterizing flavours in cigarettes (2016), including menthol (2020). The longitudinal data analysis of the EUREST-PLUS International Tobacco Control (ITC) Project Europe Surveys ( $n = 16\,534$ ; Wave 1 in 2016 and Wave 2 in 2018) found significant but small declines in the weighted prevalence of menthol (by 0.94%;  $P = 0.041$ ) and other flavoured cigarette use (by 1.32%;  $P < 0.001$ ) following the 2016 TPD. The declines tended to be driven primarily by the menthol and flavoured cigarette (MFC) smokers switching to unflavoured tobacco. Cigarette consumption declined between waves, but there were no statistically significant difference in decline between MFC and unflavoured tobacco smokers on smoking and cessation behaviours between the waves.

## Introduction

The European Tobacco Product Directive (TPD) went into effect in May 2016 and, amongst other provisions, banned cigarettes and roll your own with characterizing flavours within the European Union (EU). A transition period was granted until May 2017, with the exception of menthol cigarettes that could be sold until 2020.<sup>1,2</sup> Implementation of the TPD offers a unique opportunity to research the profiles and behaviours of menthol and flavoured cigarette (MFC) users in European Union Member States (EU MS).<sup>3,4</sup>

This report used data from the EUREST-PLUS ITC Europe Surveys before and after the 2016 TPD ban to assess the changes (i) in the prevalence of different cigarette flavours in Europe and (ii) in the smoking status, cessation behaviours and cigarette flavour preferences following the 2016 ban on cigarettes with characterizing flavours, but before the 2020 ban on menthol cigarettes. The aim of the study was to understand whether, given the 2016 ban, MFC smokers changed their smoking patterns.

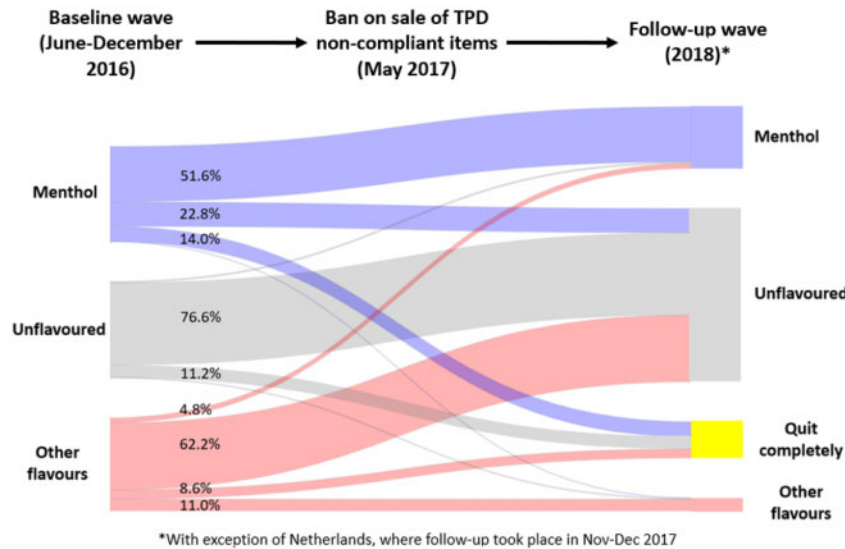

**Figure 1** Changes in smoking status and preferences for the usual cigarette flavour from pre-TPD to post-TPD among smokers who were classified as menthol, other flavours and unflavoured tobacco users at the pre-TPD wave and who were successfully follow-up at the post-TPD wave. For further details see [table 1](#). *Note:* Among menthol users at pre-TPD, by post-TPD: 51.6% continued to smoke menthol cigarettes, 22.8% switched to unflavoured tobacco, 14% quit smoking completely, 8.0% no longer reported having a usual flavour brand, 3.4% became dual users with e-cigarettes (together with any other cigarette brand type) and 0.3% switched to other flavoured tobacco. The width of the lanes is not to scale with the marginal proportions—the lanes for each flavour at Wave 1 represent 100% of the particular flavours users

## Methods

### Study design and population

This was a longitudinal study of data of the EUREST-PLUS ITC Europe Surveys from eight EU MS ( $n=19\,691$ ).<sup>4,5</sup> The baseline wave preceded the 2016 TPD ban (pre-TPD), and the second wave followed it (post-TPD, but before the implementation of the 2020 menthol flavour ban). The specific ITC waves were Wave 1 (2016) and Wave 2 (2018) of the ITC 6 European Country (6E) Survey (involving Germany, Greece, Hungary, Poland, Romania and Spain);<sup>5</sup> Wave 10 (2016) and Wave 11 (2017) of the ITC Netherlands (NL10) Survey;<sup>6</sup> and data from England collected as part of Wave 1 (2016) and Wave 2 (2018) of the Four Country Smoking and Vaping (4CV1) Survey.<sup>7</sup> Further details on the conceptual framework of ITC surveys can be found elsewhere.<sup>8</sup>

### Measures

Based on their self-reported preferred cigarette brand type, respondents were classified as: menthol, other flavoured, tobacco (unflavoured) and no usual flavour (did not indicate preference) users.<sup>3,4</sup>

We collected data on smoking status (pre-TPD: smoking daily/non-daily; post-TPD: smoking daily/non-daily/quit smoking/dual use of any cigarettes and electronic cigarettes); reduction in cigarettes smoked per day (CPD) (>5 CPD reduction, 1–5 CPD reduction, no change, 1–5 CPD increase, >5 CPD increase); quit attempts and success in the past 18 months to cover period since the baseline wave (no quit attempt/a failed quit attempt/quit smoking successfully).

Data on the following covariates were collected: age (18–24, 25–39, 40–54, 55+), nicotine dependence (as measured by the heaviness of smoking index) (range: 0–6<sup>9</sup>); sex and country.

### Data analysis

All analyses were conducted using SAS-callable SUDAAN (Version 11.0.1). Descriptive statistics were estimated to characterize smoking and quitting at pre-TPD and post-TPD.

To assess the changes in prevalence of the usual flavour of cigarettes smoked between pre- and post-TPD, we used data from all respondents who provided valid information on their flavour of cigarettes smoked pre- and/or post-TPD ( $n=16\,534$ ). Weighted, binary generalized estimating equation regression models were used to estimate the adjusted prevalence of usual flavour of cigarettes smoked pre- and post-TPD. These models controlled for sex, age and smoking status at wave of recruitment. For each flavour, an overall Model 1 was estimated; Model 2 included a country\*wave interaction effect to test whether there were differences in the adjusted prevalence of usual flavour smoked over time within each of the eight EU MS.

To assess the changes in smoking status, as well as cessation behaviours and cigarette brand preference between pre- and post-TPD; only respondents participating in both waves were included ( $n=5612$ ).

## Results

[Supplementary table S1](#) reports findings from Model 1 and Model 2 on changes in prevalence of different cigarette flavours from pre-TPD to post-TPD. The prevalence of menthol cigarette use post-TPD remained highest in Poland (11.1%), England (10.4%) and Romania (6.5%), and was lowest in Spain (1.4%). Spain was the country with the highest prevalence of other flavoured cigarettes pre-TPD but was replaced by Poland (3.7%) post-TPD. The proportion of other flavoured cigarette use post-TPD remained lowest in the Netherlands (0.3%). Overall, the combined prevalence of MFC use among smokers remained between 5% and 15% in all countries surveyed (and was highest in Poland at 14.9% and England at 11.7%), with the exception of Spain, where it fell to less than 2.5%.

We found significant but small declines in the prevalence of menthol use (by 0.94%;  $P=0.041$ ) and other flavoured cigarette use (by 1.32%;  $P<0.001$ ) between waves in the pooled sample of all countries (see [Supplementary table S1](#)). This decline in MFC use was primarily driven by smokers switching to unflavoured tobacco, rather than quitting smoking. Almost 52% of menthol smokers continued to smoke menthol cigarettes, while 22.8% switched to

**Table 1** Change in smoking status, smoking behaviour and flavour type from pre-TPD to post-TPD

|                                                 | Pre-TPD flavour type |                         |                 |                            |                            |                |                |           |          |
|-------------------------------------------------|----------------------|-------------------------|-----------------|----------------------------|----------------------------|----------------|----------------|-----------|----------|
|                                                 | Menthol              |                         | Other flavoured |                            | Tobacco only (unflavoured) |                | No usual brand |           |          |
|                                                 | <i>n</i> (%)         | 95% CI                  | <i>n</i> (%)    | 95% CI                     | <i>n</i> (%)               | 95% CI         | <i>n</i> (%)   | 95% CI    | <i>P</i> |
| Flavour type smoked post-TPD                    |                      |                         |                 |                            |                            |                |                |           |          |
| Menthol flavoured                               | 187 (51.6)           | 44.4–58.7               | 5 (4.8)         | 0.8–14.9                   | 60 (1.3)                   | 0.8–2.1        | 17 (3.0)       | 1.4–5.6   | ***      |
| Other flavoured tobacco                         | 2 (0.3)              | 0.0–1.6                 | 18 (11.0)       | 6.2–17.6                   | 34 (0.8)                   | 0.5–1.4        | 6 (0.9)        | 0.2–2.4   |          |
| Unflavoured tobacco                             | 78 (22.8)            | 17.5–29.1               | 78 (62.3)       | 51.5–71.9                  | 3450 (76.6)                | 74.6–78.4      | 270 (48.1)     | 41.9–54.3 |          |
| No usual brand                                  | 30 (8.0)             | 4.8–12.4                | 14 (11.9)       | 6.7–18.9                   | 276 (6.1)                  | 5.0–7.3        | 199 (34.4)     | 28.6–40.6 |          |
| Dual user of any brand (cig + EC)               | 11 (3.4)             | 1.6–6.2                 | 3 (1.4)         | 0.1–5.2                    | 167 (4.0)                  | 3.3–4.8        | 20 (3.1)       | 1.8–4.9   |          |
| Quit completely                                 | 54 (14.0)            | 9.8–19.4                | 13 (8.6)        | 3.7–16.5                   | 507 (11.2)                 | 9.9–12.6       | 59 (10.6)      | 7.6–14.5  |          |
| Smoking status (post-TPD)                       |                      |                         |                 |                            |                            |                |                |           |          |
| Still smoking                                   | 308 (86.0)           | 80.6–90.2               | 119 (91.0)      | 83.1–96.0                  | 3959 (88.0)                | 86.6–89.3      | 513 (88.8)     | 84.7–91.8 | NS       |
| Quit completely                                 | 54 (14.0)            | 9.8–19.4                | 14 (9.0)        | 4.0–16.9                   | 548 (12.0)                 | 10.7–13.4      | 63 (11.2)      | 8.2–15.3  |          |
|                                                 |                      | Menthol/other flavoured |                 | Tobacco only (unflavoured) |                            | No usual brand |                |           |          |
|                                                 |                      | <i>n</i> (%)            | 95% CI          | <i>n</i> (%)               | 95% CI                     | <i>n</i> (%)   | 95% CI         |           | <i>P</i> |
| Smoking status (post-TPD)                       |                      |                         |                 |                            |                            |                |                |           |          |
| Daily                                           | 376 (77.1)           | 72.0–81.5               | 3722 (82.8)     | 81.2–84.3                  | 437 (75.0)                 | 69.9–79.6      |                |           | ***      |
| Non-daily                                       | 51 (10.4)            | 7.5–14.4                | 237 (5.2)       | 4.4–6.2                    | 76 (13.7)                  | 10.2–18.1      |                |           |          |
| Quit                                            | 68 (12.5)            | 9.1–16.9                | 548 (12.0)      | 10.7–13.4                  | 63 (11.2)                  | 8.2–15.3       |                |           |          |
| Cig/day (difference between waves)              |                      |                         |                 |                            |                            |                |                |           |          |
| >5 cig/day reduction                            | 89 (19.1)            | 13.9–25.7               | 970 (22.0)      | 20.3–23.7                  | 124 (21.1)                 | 17.1–25.7      |                |           | NS       |
| 1–5 cig/day reduction                           | 107 (20.5)           | 16.6–25.1               | 901 (20.1)      | 18.6–21.7                  | 102 (19.4)                 | 15.0–24.8      |                |           |          |
| No change                                       | 203 (41.3)           | 34.5–48.4               | 1676 (36.1)     | 34.3–38.1                  | 206 (35.4)                 | 30.2–40.9      |                |           |          |
| 1–5 cig/day increase                            | 68 (14.3)            | 10.7–18.9               | 618 (14.3)      | 12.9–15.8                  | 72 (12.7)                  | 9.2–17.2       |                |           |          |
| >5 cig/day increase                             | 25 (4.8)             | 2.7–7.8                 | 311 (7.5)       | 6.3–8.9                    | 60 (11.4)                  | 8.2–15.8       |                |           |          |
| Tried to quit/quit successfully (between waves) |                      |                         |                 |                            |                            |                |                |           |          |
| Did not try to quit in past 18 months           | 302 (60.5)           | 53.9–66.8               | 2944 (66.1)     | 64.2–68.1                  | 371 (65.7)                 | 60.1–70.9      |                |           | NS       |
| Tried to quit in past 18 months                 | 125 (27.0)           | 21.7–33.1               | 1012 (21.9)     | 20.3–23.6                  | 142 (23.1)                 | 18.5–28.4      |                |           |          |
| Quit smoking successfully (since wave 1)        | 68 (12.5)            | 9.1–16.9                | 548 (12.0)      | 10.7–13.4                  | 63 (11.2)                  | 8.2–15.3       |                |           |          |

EC, electronic cigarette.

unflavoured tobacco. Among other flavoured cigarette smokers these figures were 11% and 62.3%, respectively (see [figure 1](#)).

**Table 1** presents changes from Wave 1 and Wave in the associations of cigarette flavoured smoked and smoking and cessation behaviours. Among smokers of menthol cigarettes 14% quit smoking altogether between waves, which was higher than the percentage of quitters among unflavoured tobacco smokers (12%), and among other flavoured cigarette smokers (9%). However, there was no significant association between the cigarette flavour at pre-TPD and quit status at follow-up. Smokers tended to reduce how much they smoked from the pre-TPD to post-TPD wave. However, there were no statistically significant differences between MFC smokers and unflavoured tobacco post-TPD smoking status, on whether they increased or reduced the number of cigarettes smoked per day, and in cessation behaviour between waves.

## Discussion

The present study provides a number of important insights. Importantly, the declines of MFC prevalence were driven by the MFC smokers switching to unflavoured tobacco, rather than quitting smoking. This was the case of 62% flavoured cigarette users, as expected given the ban, but also 23% of menthol cigarette users—a more surprising finding given that the ban on menthol cigarettes had not taken effect yet. Moreover, MFC smokers were not more likely to quit smoking or reduce cigarette consumption post-TPD than smokers of unflavoured cigarettes. Furthermore, despite the 2016 TPD ban, a small minority of smokers still smoked flavoured cigarettes, which could be due to the transition period in ban implementation.<sup>1</sup> Finally, on the whole in the eight EU MS there was a significant but very small decline in the MFC prevalence

immediately following the TPD ban, although the trends of use were different in each country.

These findings should be interpreted with caution and in the wider context. The TPD ban of cigarette flavourings was motivated principally by the need to reduce the appeal of cigarettes and smoking initiation among youth, whereas this sample at recruitment included only adult smokers. Furthermore, while the EUREST-PLUS ITC Europe Surveys offer the best data available to research these policies, as it is the largest cohort study in Europe evaluating the TPD, the study has some limitations, including a considerable loss-to-follow-up in several of EUREST-Plus countries, which could have introduced selection bias.<sup>10</sup>

Moreover, the TPD does not include specific measures directed at increasing the predictors of quit attempt success, such as the use of evidence-based cessation support by smokers, or provisions indicated in Article 14 of the World Health Organization (WHO) Framework Convention on Tobacco Control (FCTC).<sup>11,12</sup> Without these additional measures we may not be able to see changes in smoking prevalence at short term. Continued monitoring is needed to ascertain the long-term impact of TPD, including if the MFC smokers who moved to unflavoured cigarettes will be more likely to quit as a next step.

Crucially, there remains an opportunity for tobacco control prior to the implementation of the 2020 ban on menthol cigarettes. Countries with relatively high menthol use among smokers (especially Poland and England, but also the Netherlands, Romania and Hungary, where prevalence of menthol is above 5%) should strengthen stop smoking campaigns alongside the menthol cigarette ban, so as to aid cessation.

## Supplementary data

Supplementary data are available at *EURPUB* online.

## Acknowledgements

EUREST-PLUS consortium members: European Network on Smoking and Tobacco Prevention (ENSP), Belgium: Constantine I. Vardavas, Andrea Glahn, Christina N. Kyriakos, Dominick Nguyen, Katerina Nikitara, Cornel Radu-Loghin, Polina Starchenko. University of Crete (UOC), Greece: Aristidis Tsatsakis, Charis Girvalaki, Chryssi Igoumenaki, Sophia Papadakis, Aikaterini Papathanasaki, Manolis Tzatzarakis, Alexander I. Vardavas. Kantar Public, Belgium: Nicolas Bécuwe, Lavinia Deaconu, Sophie Goudet, Christopher Hanley, Oscar Rivière. Smoking or Health Hungarian Foundation (SHHF), Hungary: Tibor Demjén, Judit Kiss, Anna Piroška Kovacs. Tobacco Control Unit, Catalan Institute of Oncology (ICO) and Bellvitge Biomedical Research Institute (IDIBELL), Catalonia: Esteve Fernández, Yolanda Castellano, Marcela Fu, Sarah O. Nogueira, Olena Tigova. Kings College London (KCL), United Kingdom: Ann McNeill, Katherine East, Sara C. Hitchman. Cancer Prevention Unit and WHO Collaborating Centre for Tobacco Control, German Cancer Research Center (DKFZ), Germany: Ute Mons, Sarah Kahnert. National and Kapodistrian University of Athens (UoA), Greece: Yannis Tountas, Panagiotis Behrakis, Filippas T. Filippidis, Christina Gratzou, Paraskevi Katsaounou, Theodosia Peleki, Ioanna Petroulia, Chara Tzavara. Aer Pur Romania, Romania: Antigona Carmen Trofor, Marius Eremia, Lucia Lotrean, Florin Mihaltan. European Respiratory Society (ERS), Switzerland: Gernot Rohde, Tamaki Asano, Claudia Cichon, Amy Far, Céline Genton, Melanie Jessner, Linnea Hedman, Christer Janson, Ann Lindberg, Beth Maguire, Sofia Ravara, Valérie Vaccaro, Brian Ward. Maastricht University, the Netherlands: Marc Willemsen, Hein de Vries, Karin Hummel, Gera E. Nagelhout. Health Promotion Foundation (HPF), Poland: Witold A. Zatoński, Aleksandra Herbec, Kinga Janik-Konieczna, Krzysztof Przewoźniak, Mateusz Zatoński. University of Waterloo (UW), Canada: Geoffrey T. Fong, Thomas K. Agar, Pete Driezen, Shannon Gravely, Anne C. K. Quah, Mary E. Thompson.

## Funding

The EUREST-PLUS project has received funding from the European Union's Horizon 2020 research and innovation programme under grant agreement No 681109 (CIV) and the University of Waterloo (GTF). Additional support was provided to the University of Waterloo by a foundation grant from the Canadian Institutes of Health Research (FDN-148477). GTF was supported by a Senior Investigator Grant from the Ontario Institute for Cancer Research. EF is partly supported by Ministry of Universities and Research, Government of Catalonia (2017SGR319) and by the Instituto Carlos III and co-funded by the European Regional Development Fund (FEDER) (INT16/00211 and INT17/00103), Government of Spain. EF thanks CERCA Programme Generalitat de Catalunya for the institutional support to IDIBELL. The England arm of the ITC 4 Country Smoking and Vaping Survey was supported by grants from the US National Cancer Institute (P01 CA200512) and the Canadian Institutes of Health Research (FDN-148477). The ITC Netherlands Surveys were

supported by the Dutch Cancer Foundation (KWF) (UM 2014-7210).

**Conflicts of interest:** The funders had no role in the design of the study; in the collection, analyses, or interpretation of data; in the writing of the manuscript, or in the decision to publish the results. G.T.F. has served as an expert witness on behalf of governments in litigation involving the tobacco industry. K.P. reports grants and personal fees from the Polish League Against Cancer, outside the submitted work. A.M. is a UK National Institute for Health Research (NIHR) Senior Investigator. The views expressed in this article are those of the authors and not necessarily those of the NIHR, or the UK Department of Health and Social Care.

## References

- 1 EU. *European Tobacco Product Directive 2014*. Available at: [https://ec.europa.eu/health/sites/health/files/tobacco/docs/dir\\_201440\\_en.pdf](https://ec.europa.eu/health/sites/health/files/tobacco/docs/dir_201440_en.pdf) (15 December 2019, date last accessed).
- 2 Zatoński M. Evidence-based policy making? The case of Polish opposition to the EU Tobacco Products Directive. *J Health Inequal* 2016;1:36–9.
- 3 Herbec A, Zatoński M, Zatoński WA, et al. Dependence, plans to quit, quitting self-efficacy and past cessation behaviours among menthol and other flavoured cigarette users in Europe: The EUREST-PLUS ITC Europe Surveys. *Tob Induc Dis* 2018;16:19.
- 4 Zatoński M, Herbec A, Zatoński W, et al. Characterising smokers of menthol and flavoured cigarettes, their attitudes towards tobacco regulation, and the anticipated impact of the Tobacco Products Directive on their smoking and quitting behaviours: the EUREST-PLUS ITC Europe Surveys. *Tob Induc Dis* 2018;16:A4.
- 5 Vardavas CI, Bécuwe N, Demjén T, et al. Study Protocol of European Regulatory Science on Tobacco (EUREST-PLUS): Policy implementation to reduce lung disease. *Tob Induc Dis* 2018;16:2.
- 6 ITC Project, *ITC Netherlands Survey Wave 1 to 8 (2008–2014) Technical Report*. University of Waterloo, Waterloo, Ontario, Canada, and Maastricht University, The Netherlands, 2015. Available at: <https://itcproject.org/methods/technical-reports/itc-netherlands-technical-report-waves-1-8-2008-2014-september-2015/> (18 December 2019, date last accessed).
- 7 Thompson ME, Fong GT, Hammond D, et al. Methods of the International Tobacco Control (ITC) Four Country Survey. *Tob Control* 2006;15 Suppl 3:iii12–8.
- 8 Fong GT, Cummings KM, Borland R, et al. The conceptual framework of the International Tobacco Control (ITC) Policy Evaluation Project. *Tob Control* 2006;15 Suppl 3:iii3–11.
- 9 Heatherton TF, Kozłowski LT, Frecker RC, et al. Measuring the heaviness of smoking: using self-reported time to the first cigarette of the day and number of cigarettes smoked per day. *Br J Addict* 1989;84:791–9.
- 10 ITC Project, *ITC 6 European Country Wave 2 (2018) Technical Report*. University of Waterloo, Waterloo, Ontario, Canada, and European Network on Smoking and Tobacco Prevention, Brussels, Belgium, 2019. Available at: <https://itcproject.org/methods/technical-reports/itc-6-european-country-wave-2-technical-report-2018-february-2019/> (20 December 2019, date last accessed).
- 11 European Parliament and the Council of the European Union, *Directive 2014/40/EU*. Official Journal of the European Union, 2014 Apr: 1–38. Available at: [https://ec.europa.eu/health/sites/health/files/tobacco/docs/dir\\_201440\\_en.pdf](https://ec.europa.eu/health/sites/health/files/tobacco/docs/dir_201440_en.pdf) (21 December 2019, date last accessed).
- 12 Raw M. Framework Convention on Tobacco Control (FCTC) Article 14 guidelines: a new era for tobacco dependence treatment. *Addiction* 2011;106:2055–7.
